# Supplementary material for: A fluorescent heteroditopic hemicryptophane cage for the selective recognition of choline phosphate
Source: Royal Society of Chemistry journal article supplement (doi:10.1039/c4cc09428j), 2014-12-23
Supplement: c4cc09428j1.pdf [file c4cc09428j1.pdf]

# A Fluorescent Heteroditopic Hemicryptophane Cage for the Selective Recognition of Choline Phosphate

Dawei Zhang,<sup>a,b</sup> Guohua Gao,<sup>\*a</sup> Laure Guy,<sup>b</sup> Vincent Robert,<sup>c</sup> Alexandre Martinez,<sup>\*b,d</sup> Jean-Pierre Dutasta<sup>\*b</sup>

<sup>a</sup> Shanghai Key Laboratory of Green Chemistry and Chemical Processes, Department of Chemistry, East China Normal University, 3663 North Zhongshan Road, Shanghai, 200062, P. R. China. E-mail: ghgao@chem.ecnu.edu.cn

<sup>b</sup> Laboratoire de Chimie, CNRS, École Normale Supérieure de Lyon, 46, Allée d'Italie, F-69364 Lyon, France. E-mail: jean-pierre.dutasta@ens-lyon.fr; alexandre.martinez@ens-lyon.fr

<sup>c</sup> Laboratoire de Chimie Quantique Institut de Chimie, UMR CNRS 7177, Université de Strasbourg, 4, rue Blaise Pascal, F-67070 Strasbourg, France

<sup>d</sup> Equipe Chirosciences, UMR CNRS 7313-iSm2, Aix Marseille Université, Ecole Centrale de Marseille, Av. Escadrille Normandie-Niemen, 13397 Marseille Cedex 20 (France)

|                                               |     |
|-----------------------------------------------|-----|
| 1. Materials and instrumentation              | P2  |
| 2. Synthesis                                  | P2  |
| 3. Fluorescence Job plot                      | P6  |
| 4. Fluorescence spectroscopic titration       | P6  |
| 5. <sup>1</sup> H NMR spectroscopic titration | P8  |
| 6. Computational method                       | P10 |
| 7. References                                 | P10 |

## 1. Materials and instrumentation

All solvents used were of commercial grade.  $^1\text{H}$  NMR and  $^{13}\text{C}$  NMR spectra were recorded on a Bruker Avance spectrometer operating at 500.10 MHz and 125.76 MHz for  $^1\text{H}$  NMR and  $^{13}\text{C}$  NMR spectra, respectively.  $^1\text{H}$  NMR chemical shifts ( $\delta$ ) are reported in ppm and referenced to the protonated residual solvent signal. Fluorescence spectra were carried out with a Horiba-Jobin Yvon spectrofluorimeter. Mass spectra were recorded by the Centre de Spectrométrie de Masse, Institute of Chemistry, Lyon.

## 2. Synthesis

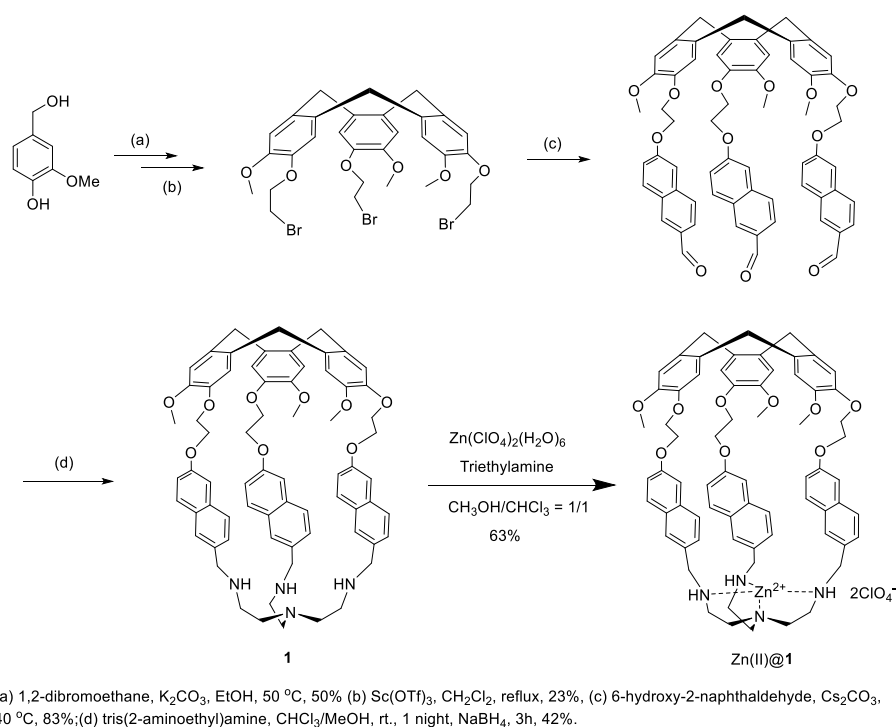

**Scheme S1.** The synthesis of  $\text{Zn}(\text{II})@1$  complex.

Hemicryptophane **1** was synthesized according to our previously reported procedure.<sup>[1]</sup>  $\text{Zn}(\text{II})@1$  complex was prepared as follow: to a solution of **1** (90.3 mg, 0.082 mmol) in 6 mL  $\text{CHCl}_3$ , 20  $\mu\text{L}$  triethylamine was added under argon followed by addition of the solution of  $\text{Zn}(\text{ClO}_4)_2(\text{H}_2\text{O})_6$  (30.5 mg, 0.082 mmol, 1.0 equivalent) in 6 mL  $\text{CH}_3\text{OH}$ . After stirring the reaction mixture at room temperature for 2 hours, a large amount of precipitate appeared. The precipitate was collected, washed thoroughly with  $\text{Et}_2\text{O}$  and dried under vacuum to give the

final product as a white solid (70.8 mg, yield 63%). The ligand **1** is soluble in most of the common solvents, for example CH<sub>2</sub>Cl<sub>2</sub>, CHCl<sub>3</sub>, acetone and DMSO. However, the Zn(II)@**1** complex is only soluble in DMSO, and moderate soluble in acetone.

**Ligand 1:**

<sup>1</sup>H NMR (500.1 MHz, 298 K, CDCl<sub>3</sub>) δ 7.33 (d, 3H, *J* = 8.4 Hz); 7.16 (d, 3H, *J* = 8.3 Hz); 7.13 (s, 3H); 7.07 (s, 3H); 7.00 (d, 3H, *J* = 9.0 Hz); 6.92 (s, 3H); 6.89 (s, 3H); 6.56 (d, 3H, *J* = 8.6 Hz); 4.84 (d, 3H, *J* = 13.8 Hz); 4.58-4.61 (m, 3H); 4.39-4.43 (m, 3H); 4.25 (t, 6H, *J* = 4.90 Hz); 3.69 (s, 9H); 3.65 (d, 3H, *J* = 13.3 Hz); 3.63 (d, 3H, *J* = 13.7 Hz); 3.53 (d, 3H, *J* = 13.3 Hz); 2.54-2.69 (m, 12H).

<sup>13</sup>C NMR (125.7 MHz, 298 K, CDCl<sub>3</sub>) δ 156.8, 148.7, 146.5, 133.6, 133.2, 131.9, 129.3, 128.9, 127.2, 126.9, 126.5, 119.4, 116.7, 113.7, 107.3, 67.6, 67.5, 56.0, 52.9, 47.7, 36.7.

ESI-MS *m/z*: found 1101.5350 [M+H]<sup>+</sup>; calcd for C<sub>69</sub>H<sub>73</sub>N<sub>4</sub>O<sub>9</sub>: 1101.5372.

IR  $\bar{\nu}$  = 2931, 1606, 1508, 1263 cm<sup>-1</sup>.

M.p. > 310 °C (decomp.).

**Zn(II)@1 complex:**

<sup>1</sup>H NMR (500.1 MHz, 298 K, DMSO-*d*<sub>6</sub>) δ 7.43-7.63 (broad, 12H); 7.20 (s, 3H); 7.05-7.11 (broad, 9H); 4.66 (d, 3H, *J* = 13.3 Hz); 4.21-4.43 (broad, 12H); 4.03 (broad, 3H); 3.93 (broad, 3H); 3.69 (s, 9H); 3.47 (d, 3H, *J* = 13.4 Hz); 2.96-3.18 (broad, 12H).

<sup>1</sup>H NMR (500.1 MHz, 373 K, DMSO-*d*<sub>6</sub>) δ 7.57 (bs, 9H); 7.32 (bs, 3H); 7.03-7.10 (m, 12H); 4.68 (d, 3H, *J* = 13.5 Hz); 4.28 (bs, 12H); 3.88 (bs, 6H); 3.70 (s, 9H); 3.50 (d, 3H, *J* = 13.5 Hz); 2.97 (bs, 12H).

<sup>13</sup>C NMR (125.7 MHz, 298 K, DMSO-*d*<sub>6</sub>) δ 156.6, 148.4, 146.5, 133.9, 133.0, 132.0, 129.4, 128.4, 127.4, 119.3, 116.4, 107.4, 66.9, 66.3, 57.2, 54.6, 51.0, 49.4, 35.4.

ESI-MS *m/z*: found 1199.4224 [M<sup>2+</sup> + Cl]<sup>+</sup>; calcd for C<sub>69</sub>H<sub>73</sub>N<sub>4</sub>O<sub>9</sub>: 1199.4274.

IR  $\bar{\nu}$  = 3237, 2934, 1612, 1507, 1483, 1263, 1218, 1282, 1085 cm<sup>-1</sup>.

M.p. > 350 °C (decomp.).

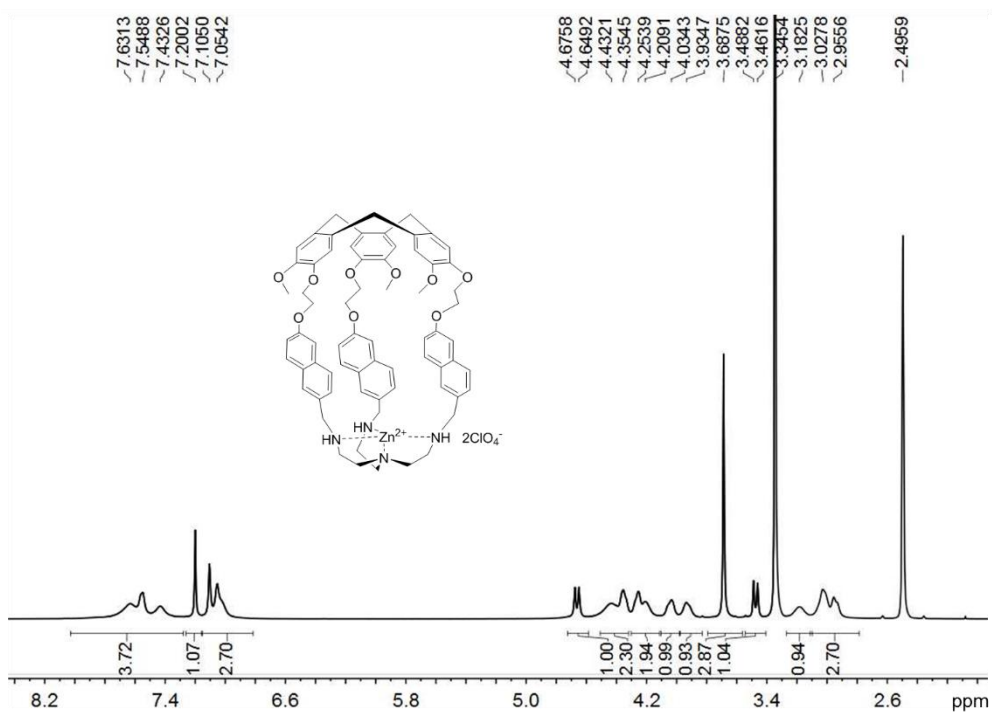

<sup>1</sup>H NMR spectrum (DMSO-*d*<sub>6</sub>, 500.1 MHz, 298K) of the Zn(II)@**1** complex.

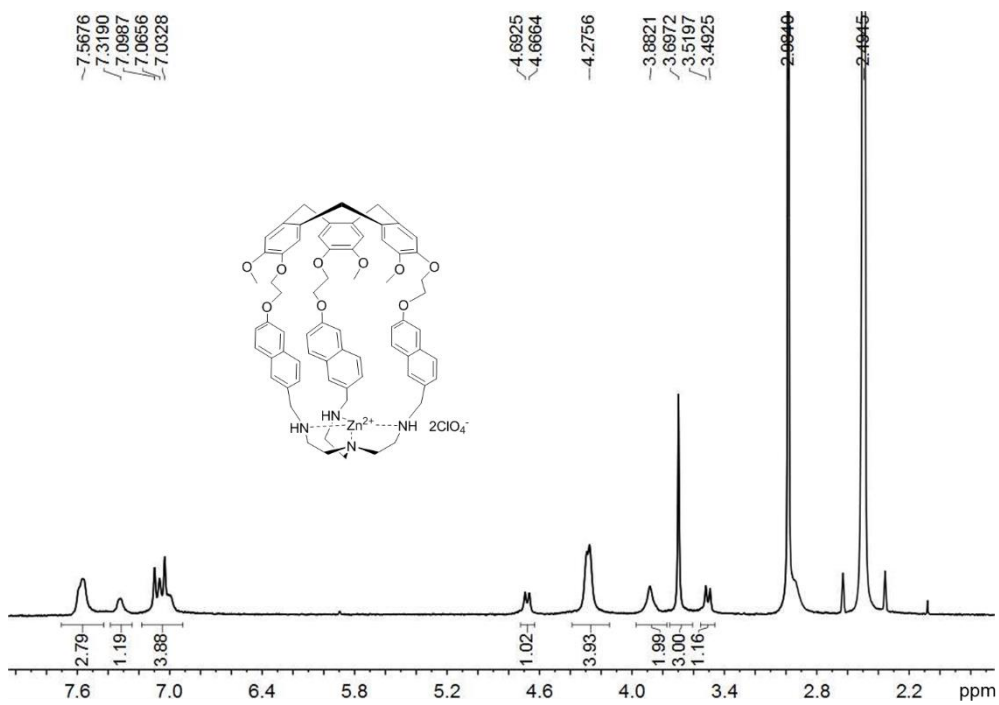

<sup>1</sup>H NMR spectrum (DMSO-*d*<sub>6</sub>, 500.1 MHz, 373K) of the Zn(II)@**1** complex.

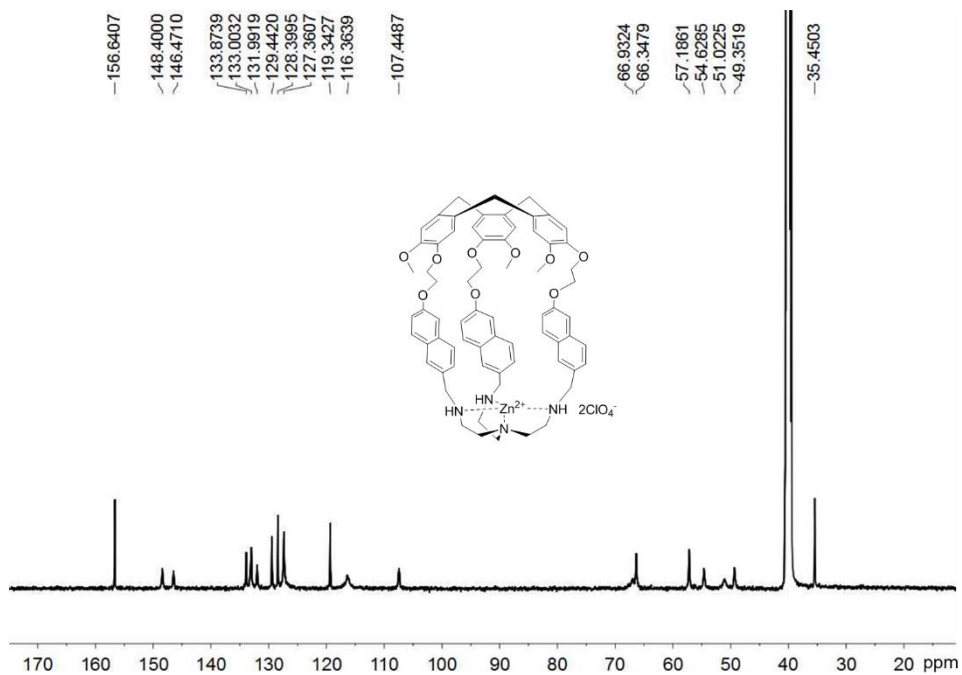

$^{13}\text{C}$  NMR spectrum (DMSO- $d_6$ , 125.7 MHz, 298K) of the Zn(II)@1 complex.

| Acquisition Parameter |            |                       |           |                  |           |
|-----------------------|------------|-----------------------|-----------|------------------|-----------|
| Source Type           | ESI        | Ion Polarity          | Positive  | Set Nebulizer    | 0.4 Bar   |
| Focus                 | Not active | Set Capillary         | 2500 V    | Set Dry Heater   | 200 °C    |
| Scan Begin            | 50 m/z     | Set End Plate Offset  | -500 V    | Set Dry Gas      | 4.0 l/min |
| Scan End              | 2000 m/z   | Set Collision Cell RF | 500.0 Vpp | Set Divert Valve | Waste     |

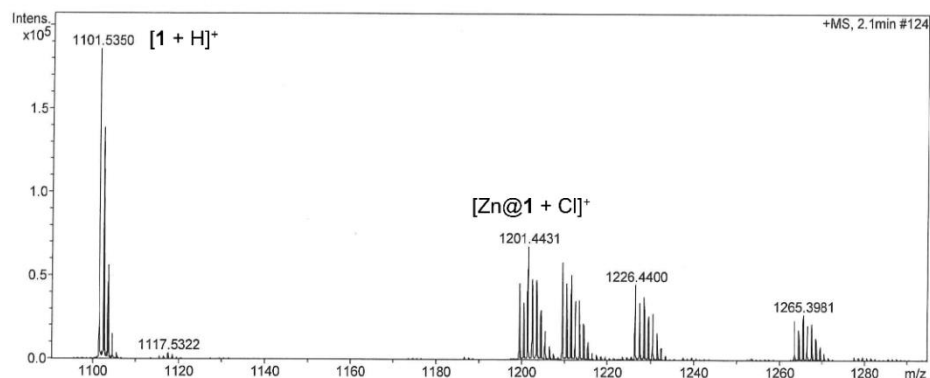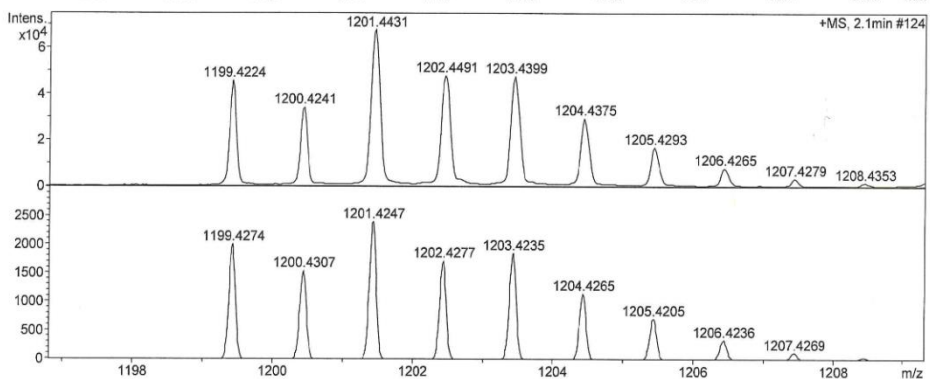

| Meas. m/z | Formula                 | m/z       | err [ppm] | mSigma |
|-----------|-------------------------|-----------|-----------|--------|
| 1199.4224 | C 69 H 72 Cl N 4 O 9 Zn | 1199.4274 | 4.1       | 72.4   |

ESI-MS spectrum of the Zn(II)@1 complex.

### 3. Fluorescence Job plot

The continuous variation method was used for determining the binding stoichiometry.<sup>[2]</sup> In this method, solutions of the host and guest at the same concentration (5  $\mu\text{M}$ ) were prepared in DMSO containing 2%  $\text{H}_2\text{O}$ . Then the two solutions were mixed in different proportions maintaining a total volume of 3 mL and a total concentration of 5  $\mu\text{M}$ . After incubating the mixture for 30 s, the spectra of the solutions for different compositions were recorded.

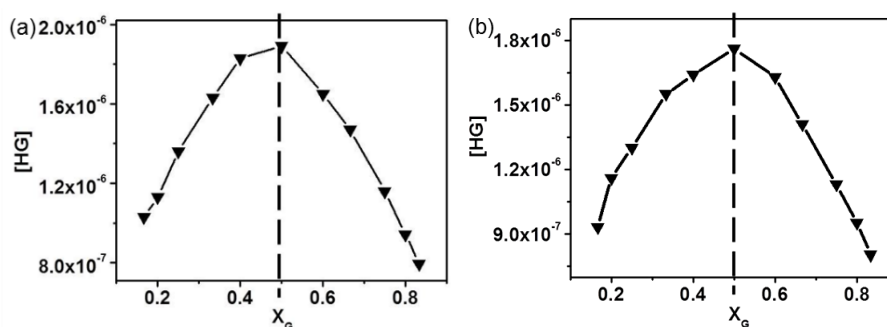

Fig. S1 Fluorescence Job plot of Zn(II)@1 with choline phosphate 2 (a) and choline 3 (b).

### 4. Fluorescence spectroscopic titration

2 mL Zn(II)@1 complex solution (5  $\mu\text{M}$ ) was taken into the cuvette, and then certain equivalents of a concentrated guest solution (0.5 mM or 5 mM) were added stepwise with a syringe. As a very small volume of guest solution was added, the final amount of the solution was almost unchanged (2 mL). The mixed solution was incubated for 30 s and then irradiated at 300 nm. The corresponding emission values at 350 nm during titration were then recorded.

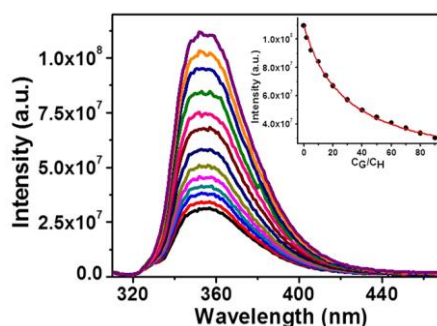

Fig. S2 Fluorescence titrations of 5  $\mu\text{M}$  Zn(II)@1 with choline 3 excited at 300 nm in DMSO containing 2% water. Inset: the intensity at 350 nm as a function of the added choline 3.

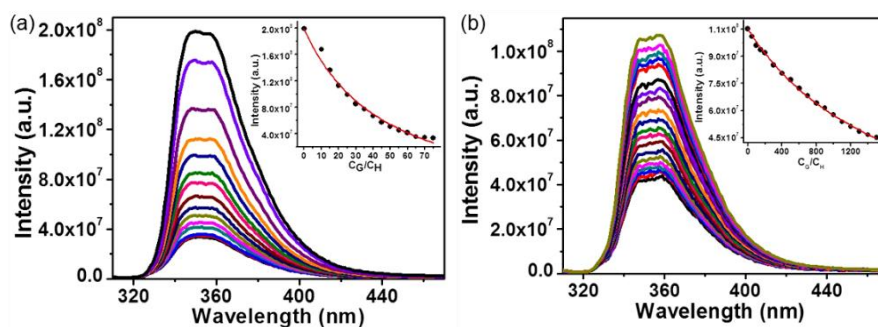

**Fig. S3** Fluorescence titrations of 5 μM Zn(II)@1 with choline phosphate 2 (a) and choline 3 (b) excited at 300 nm in DMSO/H<sub>2</sub>O (80/20, v/v). Inset: the intensity at 350 nm as a function of the guest.

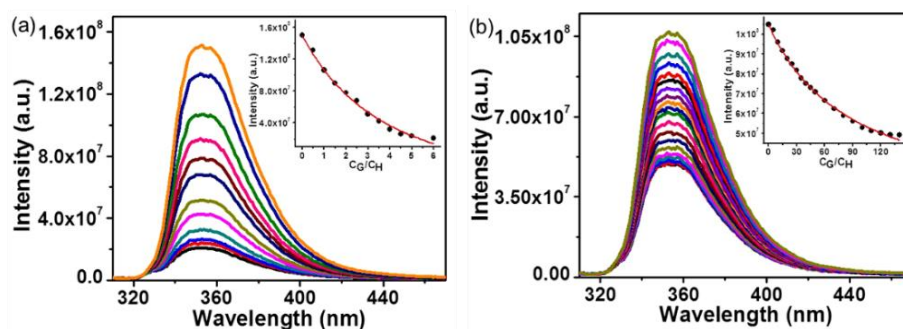

**Fig. S4** Fluorescence titrations of 5 μM Zn(II)@1 excited at 300 nm with guest 4 (a) and guest 5 (b) in DMSO containing 2% water. Insets: the intensity at 350 nm as a function of the guest.

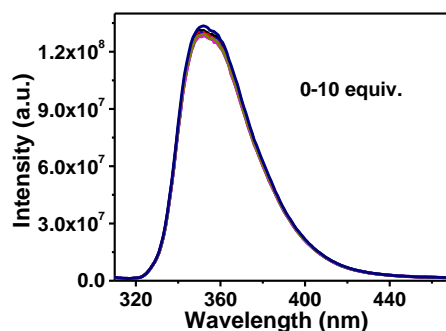

**Fig. S5** Fluorescence titrations of 5 μM Zn(II)@1 excited at 300 nm with taurine 6 in DMSO containing 2% water.

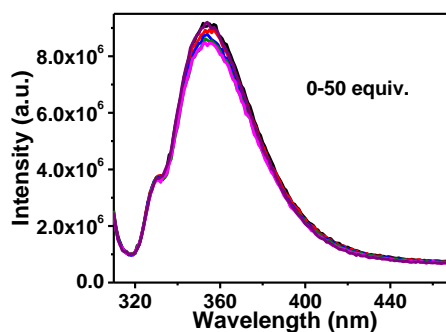

**Fig. S6** Fluorescence titrations of 5 μM ligand 1 excited at 300 nm with choline phosphate 2 in DMSO containing 2% water.

## 5. $^1\text{H}$ NMR spectroscopic titration

0.5 mL Zn(II)@**1** complex solution was taken into the NMR spectroscopy tube, and then certain equivalents of a concentrated guest solution were added stepwise with a syringe. As a very small volume of guest solution was added, the final amount of the solution was almost unchanged (0.5 mL). The mixed solution was incubated for 30 s and then the measurement of  $^1\text{H}$  NMR spectroscopy of the solution was performed.

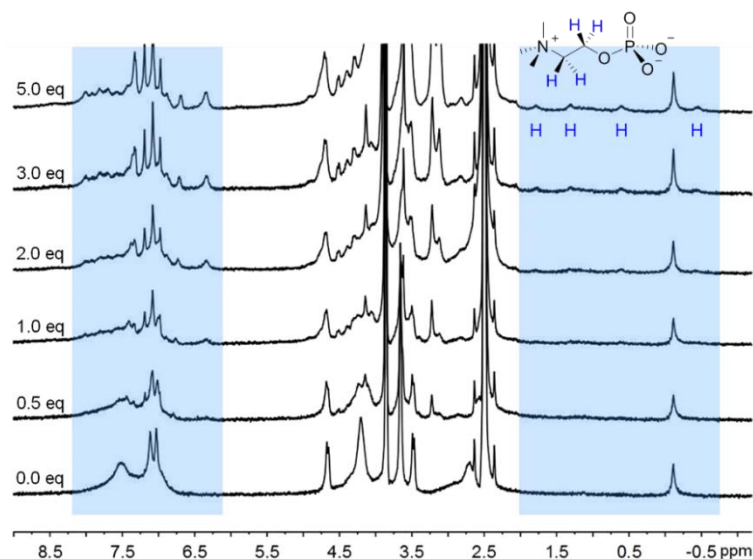

**Fig. S7**  $^1\text{H}$  NMR titrations of 1 mM Zn(II)@**1** with choline phosphate **2** at 298 K in DMSO- $d_6$ /D $_2$ O (80/20, v/v). H atoms in blue are attributed to the four diastereotopic protons of the encaged **2**.

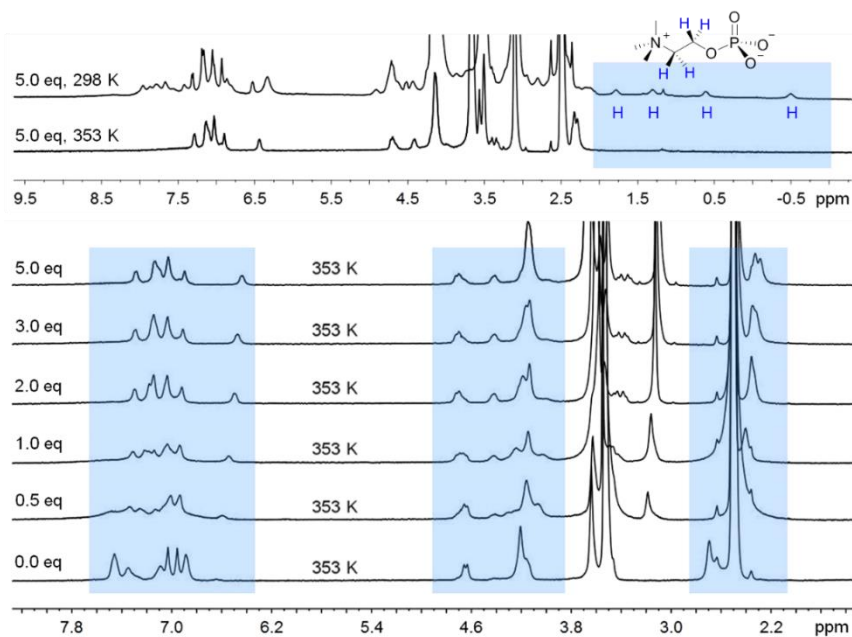

**Fig. S8**  $^1\text{H}$  NMR titrations of 1 mM Zn(II)@**1** with choline phosphate **2** at 353 K and then return to 298 K in DMSO- $d_6$ /D $_2$ O (80/20, v/v).



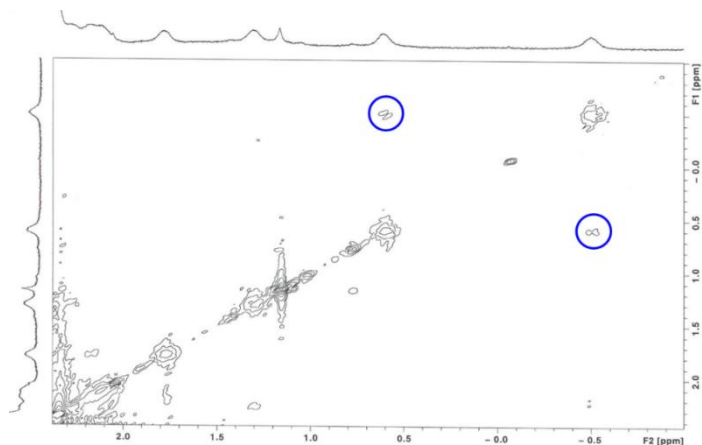

**Fig. S9** The up-field region of the 2D COSY NMR spectrum for the mixture of Zn(II)@**1** and 5 equiv. of choline phosphate **2** in DMSO- $d_6$ /D $_2$ O (80/20, v/v).

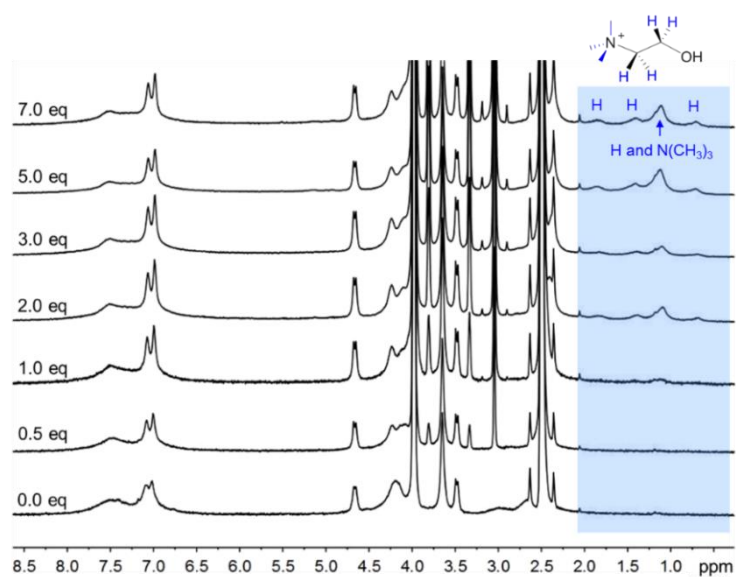

**Fig. S10**  $^1\text{H}$  NMR titrations of 1 mM Zn(II)@**1** with choline **3** at 298 K in DMSO- $d_6$ /D $_2$ O (80/20, v/v). H atoms in blue are attributed to the diastereotopic protons of methylene and N(CH $_3$ ) $_3$  of the engaged **3**.

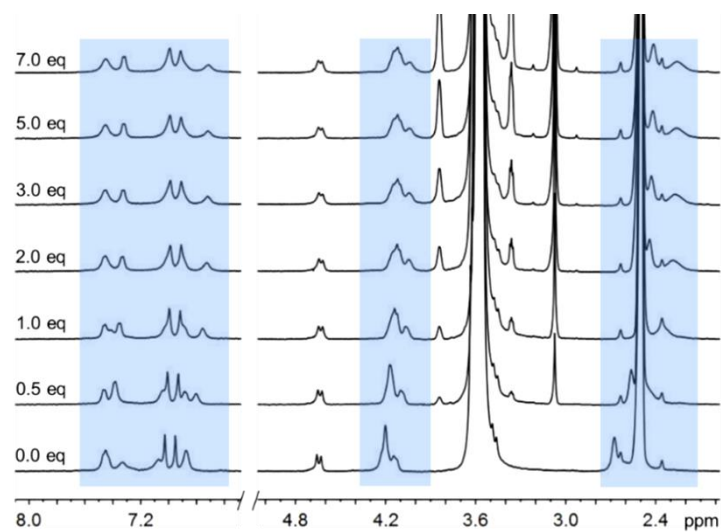

**Fig. S11**  $^1\text{H}$  NMR titrations of 1 mM Zn(II)@**1** with choline **3** at 353 K in DMSO- $d_6$ /D $_2$ O (80/20, v/v).

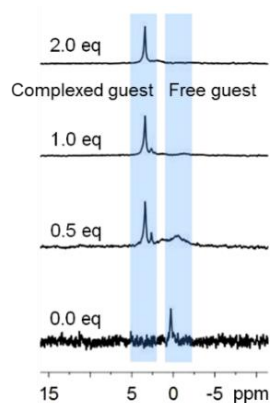

**Fig. S12**  $^{31}\text{P}$  NMR titrations of 1 mM choline phosphate **2** with Zn(II)@**1** at 298 K in DMSO- $d_6$ /D $_2$ O (80/20, v/v).

## 6. Computational method

Ab initio evaluations were performed using the Gaussian 03 package<sup>17</sup> within a restricted DFT framework.<sup>[3]</sup> In order to access geometrical information upon the host-guest species, full geometry optimizations were performed using DFT calculations. A combination of BP86 function and an all electron 6-31G\* basis set including polarization functions has proven to be very satisfactory for similar issues.<sup>[4]</sup> We checked using the hybrid B3LYP function that our results do not suffer from the arbitrariness of the exchange correlation function.

## 7. Reference

- [1] (a) B. Chatelet, E. Payet, O. Perraud, P. Dimitrov-Raytchev, L.-L. Chapellet, V. Dufaud, A. Martinez and J.-P. Dutasta, *Org. Lett.*, 2011, **13**, 3706; (b) O. Perraud, J.-B. Tommasino, V. Robert, B. Albela, L. Khrouz, L. Bonneviot, J.-P. Dutasta and A. Martinez, *Dalton Trans.*, 2013, **42**, 1530.
- [2] P. Job, *Ann. Chim.*, 1928, **9**, 113.
- [3] Gaussian 03: M. J. Frisch, G. W. Trucks, H. B. Schlegel, G. E. Scuseria, M. A. Robb, J. R. Cheeseman, G. Scalmani, V. Barone, B. Mennucci, G. A. Petersson, H. Nakatsuji, M. Caricato, X. Li, H. P. Hratchian, A. F. Izmaylov, J. Bloino, G. Zheng, J. L. Sonnenberg, M. Hada, M. Ehara, K. Toyota, R. Fukuda, J. Hasegawa, M. Ishida, T. Nakajima, Y. Honda, O. Kitao, H. Nakai, T. Vreven, J. A. Jr. Montgomery, J. E. Peralta, F. Ogliaro, M. Bearpark, J. J. Heyd, E. Brothers, K. N. Kudin, V. N. Staroverov, R. Kobayashi, J. Normand, K. Raghavachari, A. Rendell, J. C. Burant, S. S. Iyengar, J. Tomasi, M. Cossi, N. Rega, J. M.

Millam, M. Klene, J. E. Knox, J. B. Cross, V. Bakken, C. Adamo, J. Jaramillo, R. Gomperts, R. E. Stratmann, O. Yazyev, A. J. Austin, R. Cammi, C. Pomelli, J. W. Ochterski, R. L. Martin, K. Morokuma, V. G. Zakrzewski, G. A. Voth, P. Salvador, J. J. Dannenberg, S. Dapprich, A. D. Daniels, O. Farkas, J. B. Foresman, J. V. Ortiz, J. Cioslowski, D. J. Fox, *Gaussian*, Wallingford, CT, 2009.

[4] O. Perraud, V. Robert, A. Martinez and J.-P. Dutasta, *Chem. Eur. J.*, 2011, **17**, 13405.
